# Supplementary material for: Isolation and Characterization of Euglena gracilis-Associated Bacteria, Enterobacter sp. CA3 and Emticicia sp. CN5, Capable of Promoting the Growth and Paramylon Production of E. gracilis under Mixotrophic Cultivation
Source: MDPI journal article supplement (doi:10.3390/microorganisms9071496), 2021-07-13
Supplement: s1 [file s1]

## Supplementary Materials

**Table S1** List of bacterial strains isolated in this study.

| Name | Identification *                                          |                    |
|------|-----------------------------------------------------------|--------------------|
|      | Closest strain                                            | Similarity, bp (%) |
| CA1  | <i>Microbacterium neimengense</i> 7087 <sup>T</sup>       | 814/822 (99.0%)    |
| CA2  | <i>Microbacterium neimengense</i> 7087 <sup>T</sup>       | 806/812 (99.3%)    |
| CA3  | <i>Enterobacter kobei</i> strain JCM 8580 <sup>T</sup>    | 804/822 (97.8%)    |
| CA4  | <i>Kaistia algarum</i> LYH11 <sup>T</sup>                 | 751/791 (94.9%)    |
| CA6  | <i>Achromobacter insolitus</i> LMG 6003 <sup>T</sup>      | 816/819 (99.6%)    |
| CA7  | <i>Microbacterium neimengense</i> 7087 <sup>T</sup>       | 805/812 (99.1%)    |
| CA8  | <i>Achromobacter insolitus</i> LMG 6003 <sup>T</sup>      | 802/816 (98.3%)    |
| CA9  | <i>Achromobacter insolitus</i> LMG 6003 <sup>T</sup>      | 814/827 (98.4%)    |
| CN1  | <i>Pedobacter boryungensis</i> BR-9 <sup>T</sup>          | 665/694 (95.8%)    |
| CN2  | <i>Phenylobacterium lituiforme</i> FaiI3 <sup>T</sup>     | 794/809 (98.1%)    |
| CN3  | <i>Sphingomonas sanguinis</i> NBRC 13937 <sup>T</sup>     | 779/815 (95.6%)    |
| CN4  | <i>Achromobacter insolitus</i> LMG 6003 <sup>T</sup>      | 816/818 (99.6%)    |
| CN5  | <i>Emticicia fontis</i> IMCC1731 <sup>T</sup>             | 788/823 (95.7%)    |
| CN6  | <i>Elizabethkingia miricola</i> W3-B1 <sup>T</sup>        | 804/808 (99.5%)    |
| CN7  | <i>Enterobacter kobei</i> strain CIP 105566 <sup>T</sup>  | 800/822 (97.3%)    |
| CN8  | <i>Herminiimonas contaminans</i> CCUG 53591 <sup>T</sup>  | 818/821 (99.6%)    |
| CN9  | <i>Sediminibacterium goheungense</i> HME7863 <sup>T</sup> | 799/803 (99.5%)    |
| CN10 | <i>Pedobacter boryungensis</i> BR-9 <sup>T</sup>          | 804/818 (98.3%)    |
| CN11 | <i>Erythrobacter xanthus</i> SM1501 <sup>T</sup>          | 773/810 (95.4%)    |
| CN12 | <i>Pedobacter boryungensis</i> BR-9 <sup>T</sup>          | 797/818 (97.4%)    |
| CN13 | <i>Sediminibacterium roseum</i> SYL130 <sup>T</sup>       | 804/820 (98.0%)    |
| CN14 | <i>Polaromonas eurypsychrophila</i> B717-2 <sup>T</sup>   | 790/812 (97.3%)    |
| CN15 | <i>Sediminibacterium goheungense</i> HME7863 <sup>T</sup> | 788/801 (98.4%)    |

\*Partial 16S rRNA genes were amplified by PCR using primers 10F (5'-GTTTGATCCTGGCTCA-3') and 810R (5'-TACCAGGGTATCTAATCC-3'). The closest strains were identified based on 16S rRNA gene-sequence similarities with type strain sequences, which were determined by performing BLAST searches against NCBI GenBank.

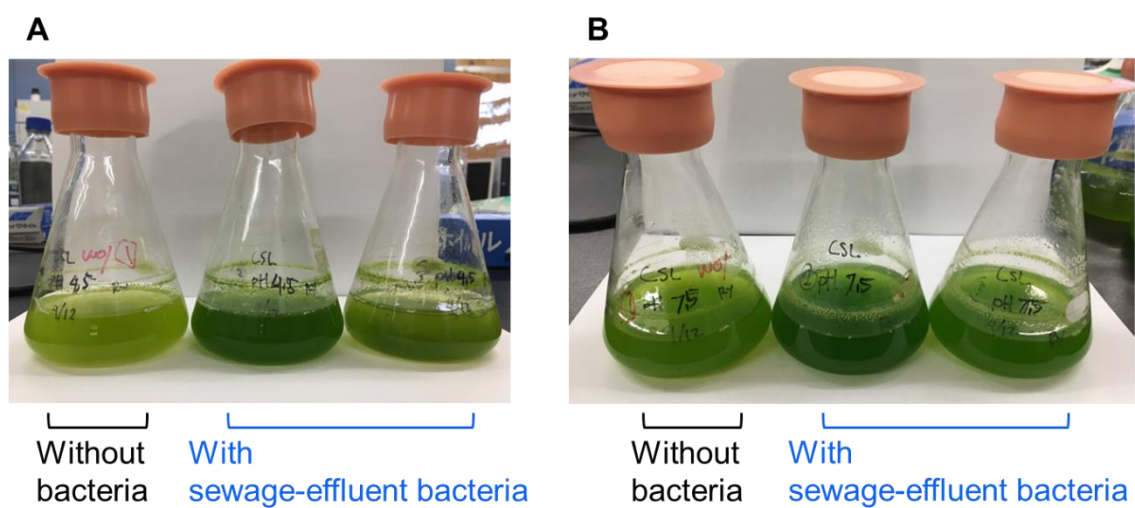

**Figure S1.** Images of *Euglena gracilis* cultures in C-NH<sub>4</sub> medium with 0.5 g L<sup>-1</sup> corn steep liquor (CSL) at pH 4.5 (A) or pH 7.5 (B) and with or without sewage-effluent bacteria for 10 d. The final biomass concentrations of *E. gracilis* grown in C-NH<sub>4</sub> with 0.5 g L<sup>-1</sup> CSL with or without effluent bacteria at pH 4.5 were 349.3 ± 15.9 mg L<sup>-1</sup> and 201.4 ± 8.5 mg L<sup>-1</sup>, respectively, and at pH 7.5 were 428.6 ± 47.1 mg L<sup>-1</sup> and 279.3 ± 23.1 mg L<sup>-1</sup>, respectively.

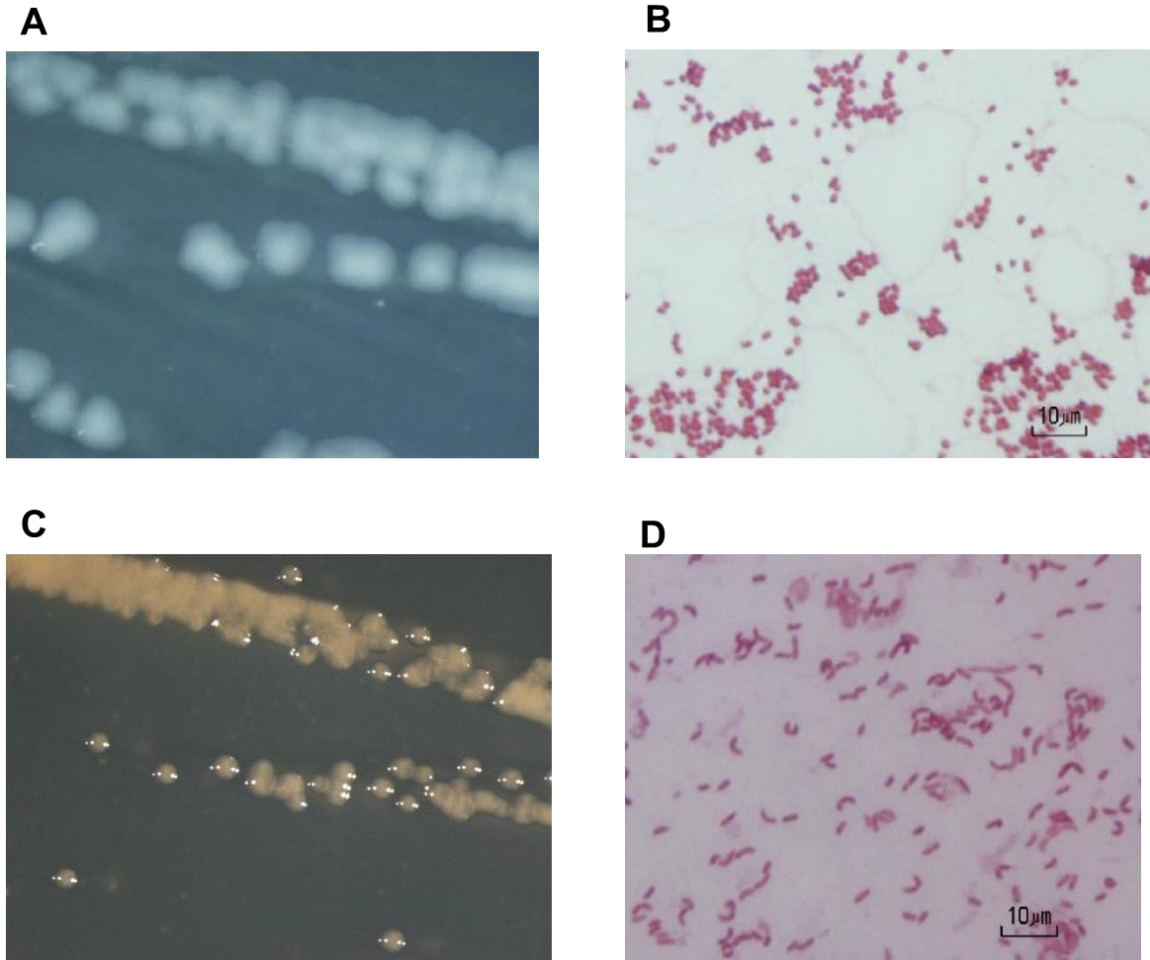

**Figure S2.** Images of *Enterobacter* sp. CA3 (acidophilic bacterium) colonies on R2A agar (A) and a light microscope image after Gram staining (B) and images of *Emticicia* sp. CN5 (neutrophilic bacterium) colonies on R2A agar (C) and a light microscope image after Gram staining (D).
